# Supplementary material for: TMEM16A/F support exocytosis but do not inhibit Notch-mediated goblet cell metaplasia of BCi-NS1.1 human airway epithelium
Source: Frontiers journal article supplement (doi:10.3389/fphys.2023.1157704), 2023-05-09
Supplement: Data_Sheet_1.PDF [file Data_Sheet_1.PDF]

**A** Differentiation media

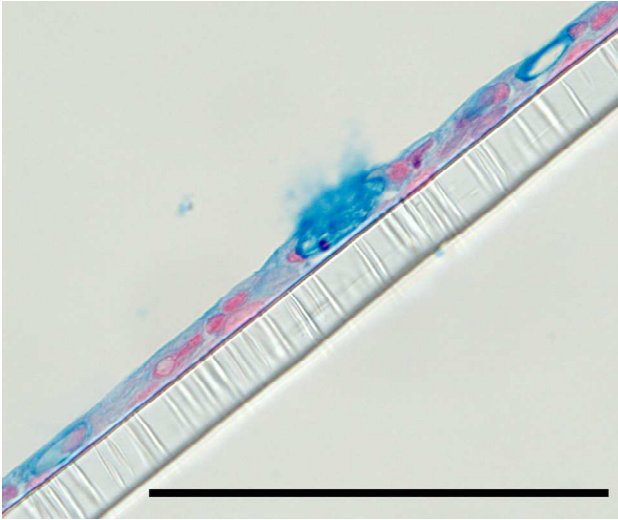

PneumaCult TM media

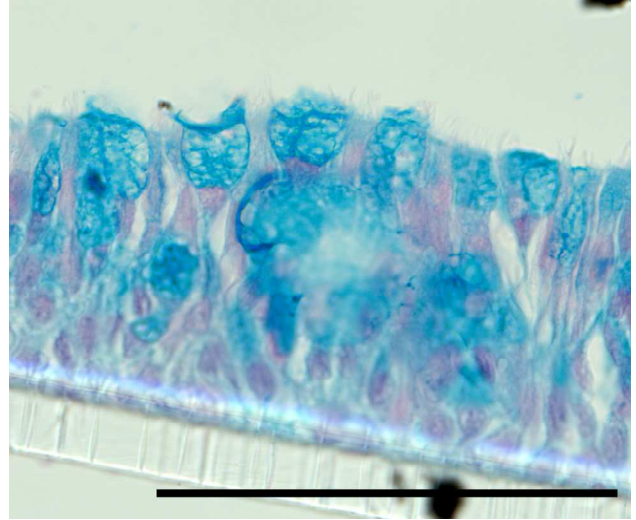

**B** Differentiation Acet. Tub.

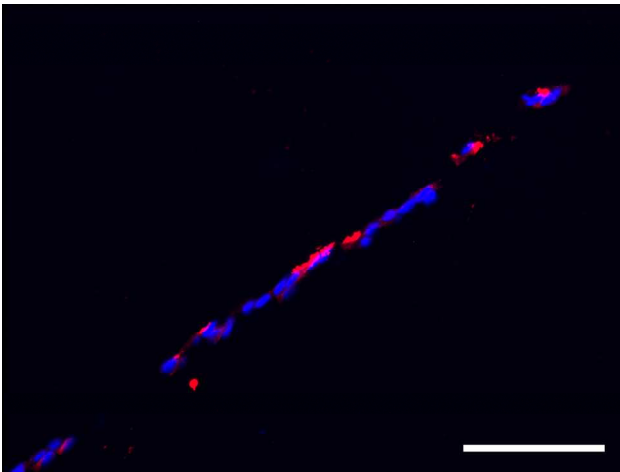

PneumaCult TM Acet. Tub.

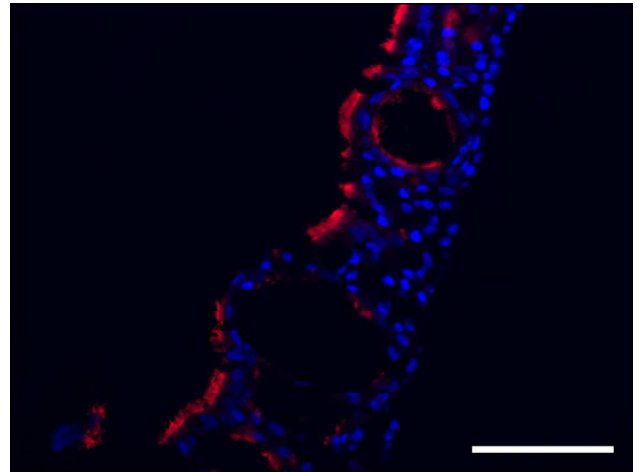

Differentiation MUC5AC

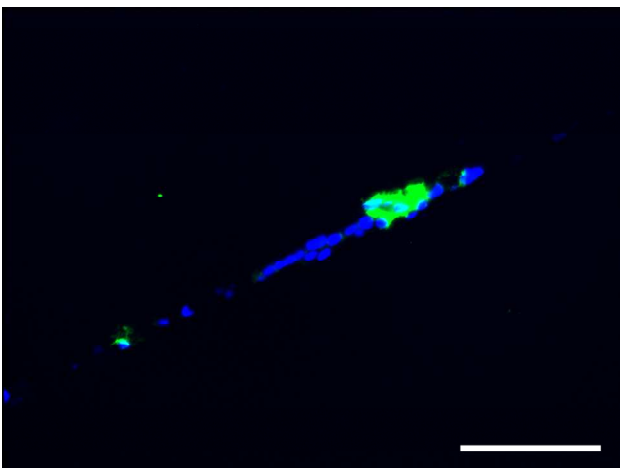

PneumaCult TM MUC5AC

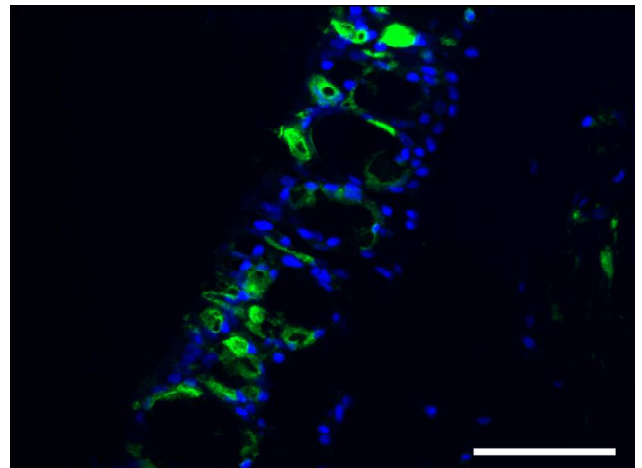

**Supplementary Figure 1:** Culture media dependent differentiation of BCI-NS1 human airway epithelial cells. A) ALI cultures of BCI-NS1 cells grown in differentiation media (DMEM/Ham's F12 + 2% USG) or PneumaCult TM media. B) Immunocytochemistry of acetylated tubulin and MUC5AC of BCI-NS1 cells grown in differentiation media or PneumaCult TM media.
